# Supplementary material
Source: Springer Nature journal article supplement (https://www.springermedizin.de/resource/supplementary/13054_2011_9909_MOESM6_ESM.pdf/9707184)

# Plateau Pressure, PEEP and PaO<sub>2</sub>/FIO<sub>2</sub>

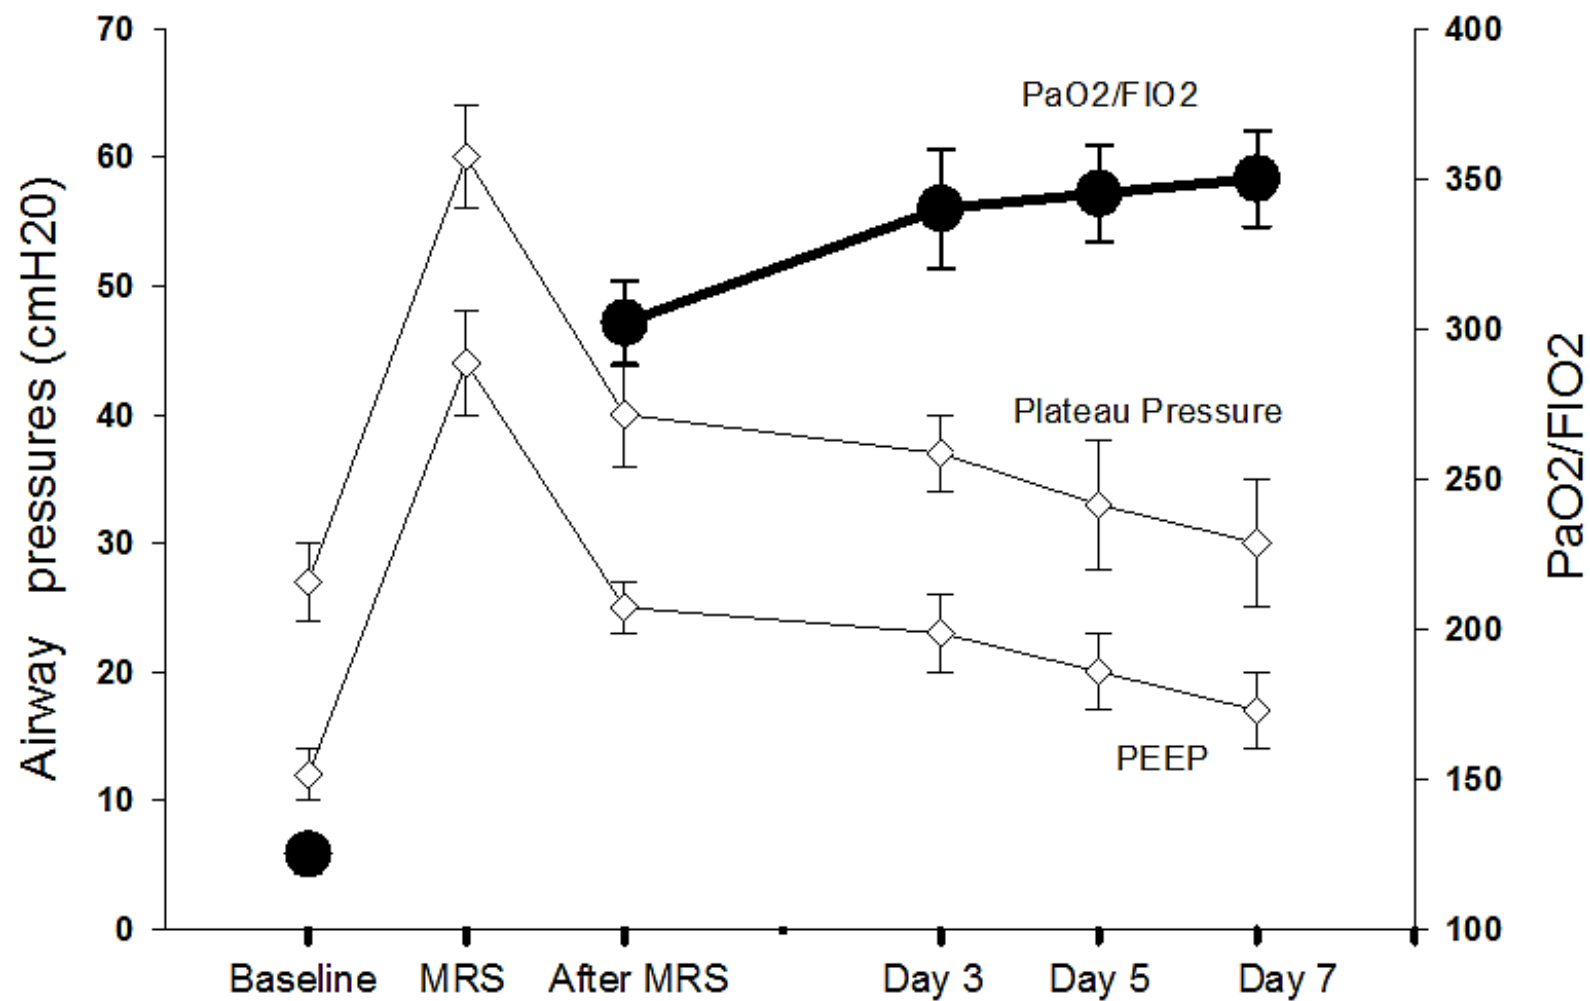

Supplement: MOESM6 [file 9707184]
